# Supplementary material for: Identification of PARN nuclease activity inhibitors by computational-based docking and high-throughput screening
Source: Springer Nature journal article supplement (doi:10.1038/s41598-023-32039-z), 2023-03-31
Supplement: MOESM1 [file 41598_2023_32039_MOESM1_ESM.pdf]

**Figure S1. Original images of gels and blots acquired during the study.**

Uncropped Figure 3c

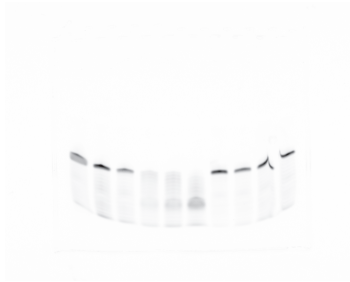

Uncropped Figure 3d

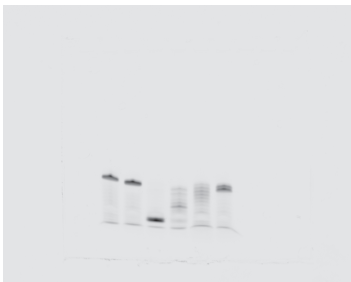

Uncropped Figure 5b (top)

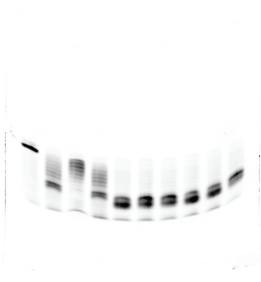

Uncropped Figure 5b (bottom)

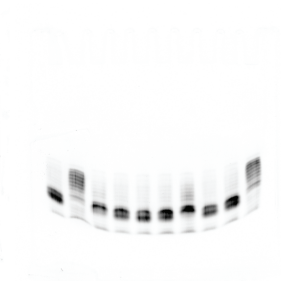

Uncropped Figure 7a (PARN)

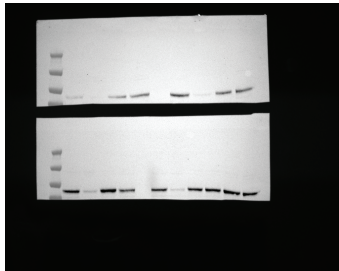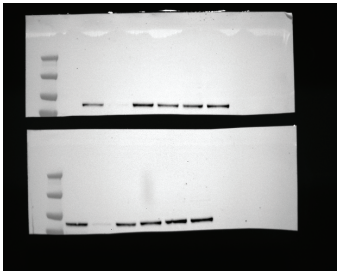

Uncropped Figure 7a (GAPDH)

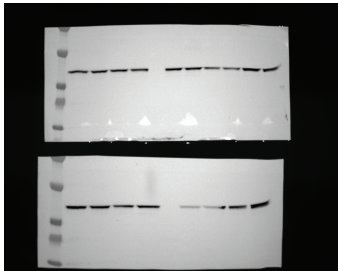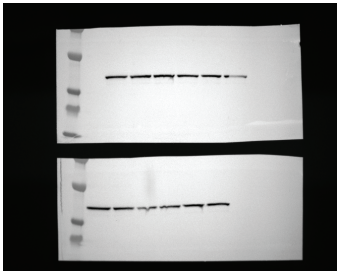

Uncropped Figure 7c (miR-21-5p)

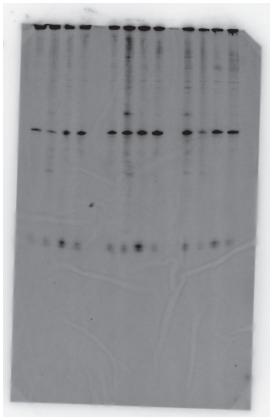

Uncropped Figure 7c (U1+5S)

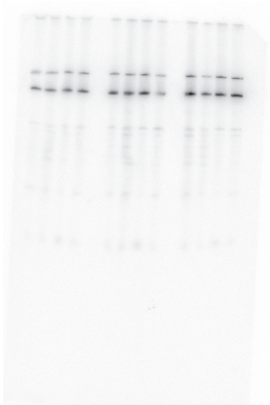

Uncropped Figure 7h (miR-21-5p)

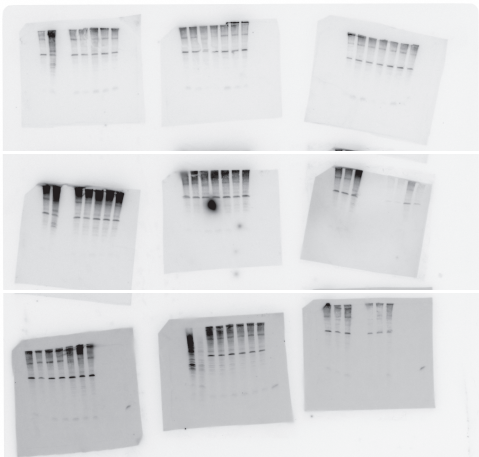

Uncropped Figure 7h (U1+5S)

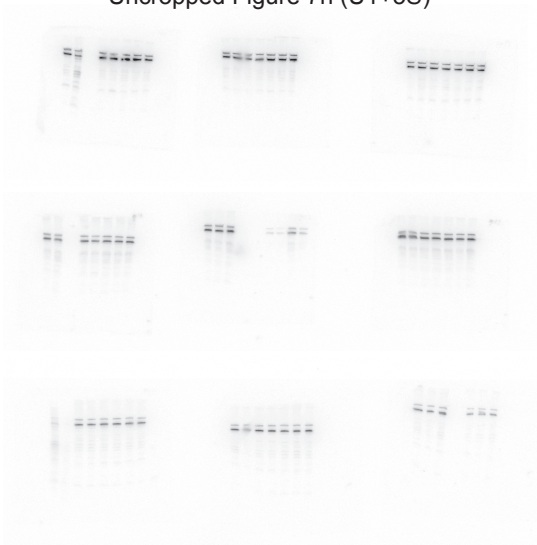

**Figure S2. Chemical structures of TH11, TH15, and TH16**

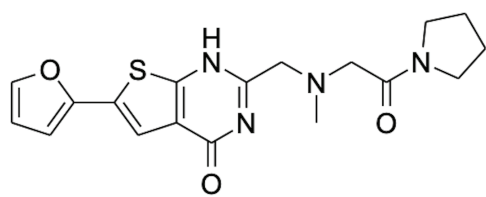

**TH11**

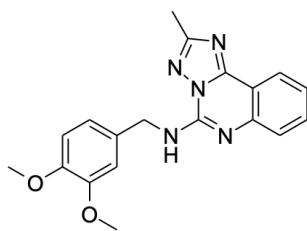

**TH15**

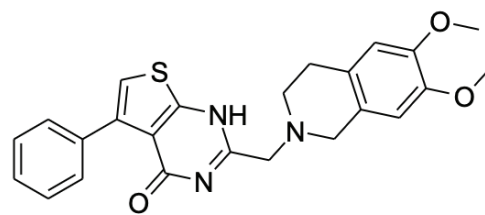

**TH16**
